# Supplementary material for: Incomplete LPS Core-Specific Felix01-Like Virus vB_EcoM_VpaE1
Source: PubMed Central journal article supplement (PMC4690856; doi:10.3390/v7122932), 2015-11-27
Supplement: viruses-07-02932-s001.pdf [file viruses-07-02932-s001.pdf]

# Supplementary Material: Incomplete LPS Core-specific *Felix01likevirus* vB\_EcoM\_VpaE1

Eugenijus Šimoliūnas, Monika Vilkaitytė, Laura Kaliniene, Aurelija Zajančauskaitė, Algirdas Kaupinis, Juozas Staniulis, Mindaugas Valius, Rolandas Meškys and Lidija Truncaitė

**Table S1.** List of Annotated VpaE1 ORFs.

| VpaE1 ORF, Position | Predicted Function (Protein Length aa)                      | Significant Match (Protein Length aa)                                                                       | Identity aa %/Similarity aa% (Length of the Overlapping Segment) | E Value |
|---------------------|-------------------------------------------------------------|-------------------------------------------------------------------------------------------------------------|------------------------------------------------------------------|---------|
| ORF01<br>1..2367    | rIIA (788)                                                  | <a href="#">gb AGF88671.1 </a> rIIA protein<br><i>Salmonella</i> phage FSL SP-010 (786)                     | 98/99<br>(786)                                                   | 0.0     |
| ORF02<br>2449..3558 | rIIB (369)                                                  | <a href="#">gb AFU62447.1 </a> hypothetical protein<br><i>Escherichia</i> phage EC6 (369)                   | 99/99<br>(369)                                                   | 0.0     |
| ORF03<br>3660..4208 | hypothetical protein (182)                                  | <a href="#">gb AGF88669.1 </a> hypothetical protein SP010_00055<br><i>Salmonella</i> phage FSL SP-010 (182) | 99/99<br>(182)                                                   | 4e-129  |
| ORF04<br>4186..4881 | putative PseT polynucleotide 5'-kinase/3'-phosphatase (231) | <a href="#">ref NP_944782.1 </a> hypothetical protein Felix01p006<br><i>Salmonella</i> phage FelixO1 (231)  | 98/99<br>(231)                                                   | 5e-168  |
| ORF05<br>4892..5356 | hypothetical protein (154)                                  | <a href="#">AIK67816.1</a> hypothetical protein HY02_005<br><i>Escherichia</i> phage HY02 (159)             | 97/98<br>(154)                                                   | 2e-102  |
| ORF06<br>5409..5756 | hypothetical protein (115)                                  | <a href="#">ref NP_944790.1 </a> phage conserved protein<br><i>Salmonella</i> phage FelixO1 (115)           | 100/100<br>(115)                                                 | 2e-78   |
| ORF07<br>5650..5919 | hypothetical protein (89)                                   | <a href="#">ref NP_944791.1 </a> hypothetical protein Felix01p015<br><i>Salmonella</i> phage FelixO1 (89)   | 100/100<br>(89)                                                  | 2e-57   |
| ORF08<br>5916..6185 | hypothetical protein (89)                                   | <a href="#">gb AGF89432.1 </a> hypothetical protein SP107_00310<br><i>Salmonella</i> phage FSL SP-107 (89)  | 98/100<br>(89)                                                   | 3e-59   |
| ORF09<br>6182..6496 | hypothetical protein (104)                                  | <a href="#">ref NP_944793.2 </a> hypothetical protein Felix01p017<br><i>Salmonella</i> phage FelixO1 (102)  | 100/100<br>(102)                                                 | 3e-69   |
| ORF10<br>6182..6496 | hypothetical protein (108)                                  | <a href="#">gb AGR48411.1 </a> hypothetical protein JH2_015<br><i>Escherichia</i> phage JH2 (108)           | 96/98<br>(108)                                                   | 3e-70   |
| ORF11<br>6787..7014 | hypothetical protein (75)                                   | <a href="#">YP_009146257.1</a> hypothetical protein HB2014_12<br><i>Salmonella</i> phage HB-2014 (75)       | 100/100<br>(75)                                                  | 3e-45   |

Table S1. Cont.

| VpaE1 ORF, Position   | Predicted Function (Protein Length aa) | Significant Match (Protein Length aa)                                                                         | Identity aa %/Similarity aa% (Length of the Overlapping Segment) | E Value |
|-----------------------|----------------------------------------|---------------------------------------------------------------------------------------------------------------|------------------------------------------------------------------|---------|
| ORF12<br>7007..7207   | hypothetical protein (66)              | <a href="#">ref YP_002922792.1 </a> hypothetical protein WV8_gp011<br><i>Escherichia</i> phage wV8 (66)       | 100/100<br>(66)                                                  | 2e-40   |
| ORF13<br>7209..7994   | putative phosphatase (261)             | <a href="#">gb AFQ96092.1 </a> phage conserved protein<br>Enterobacteria phage UAB_Phi87 (261)                | 98/99<br>(261)                                                   | 0.0     |
| ORF14<br>8504..8884   | hypothetical protein (126)             | <a href="#">YP_009146262.1</a> hypothetical protein HB2014_17<br><i>Salmonella</i> phage HB-2014 (126)        | 95/98<br>(126)                                                   | 4e-82   |
| ORF15<br>8973..9230   | hypothetical protein (85)              | <a href="#">AKC04844.1</a> hypothetical protein AYO145A_016<br><i>Escherichia</i> phage vB_EcoM_AYO145A (85)  | 89/94<br>(85)                                                    | 9e-45   |
| ORF16<br>9321..9617   | hypothetical protein (98)              | <a href="#">AKC04846.1</a> hypothetical protein AYO145A_018<br><i>Escherichia</i> phage vB_EcoM_AYO145A (98)  | 94/97<br>(98)                                                    | 2e-60   |
| ORF17<br>9611..9943   | hypothetical protein (110)             | <a href="#">gb AGF88780.1 </a> hypothetical protein SP010_00670<br><i>Salmonella</i> phage FSL SP-010 (110)   | 97/98<br>(110)                                                   | 8e-69   |
| ORF18<br>10034..10306 | hypothetical protein (90)              | <a href="#">ref NP_944813.1 </a> hypothetical protein Felix01p037<br><i>Salmonella</i> phage FelixO1 (105)    | 97/97<br>(90)                                                    | 2e-58   |
| ORF19<br>10393..10797 | hypothetical protein (134)             | <a href="#">AKC04849.1</a> hypothetical protein AYO145A_021<br><i>Escherichia</i> phage vB_EcoM_AYO145A (134) | 97/97<br>(134)                                                   | 5e-89   |
| ORF20<br>10897..11100 | hypothetical protein (67)              | <a href="#">YP_009146268.1</a> hypothetical protein HB2014_23<br><i>Salmonella</i> phage HB-2014 (67)         | 97/97<br>(67)                                                    | 4e-38   |
| ORF21<br>11186..11728 | hypothetical protein (180)             | <a href="#">AIK67833.1</a> hypothetical protein HY02_022<br><i>Escherichia</i> phage HY02 (180)               | 94/97<br>(180)                                                   | 2e-121  |
| ORF22<br>11795..12028 | hypothetical protein (77)              | <a href="#">gb AGF88777.1 </a> hypothetical protein SP010_00655<br><i>Salmonella</i> phage FSL SP-010 (77)    | 97/100<br>(77)                                                   | 1e-47   |
| ORF23<br>12118..12459 | hypothetical protein (113)             | <a href="#">gb AGR48527.1 </a> hypothetical protein JH2_131<br><i>Escherichia</i> phage JH2 (113)             | 94/97<br>(113)                                                   | 4e-74   |
| ORF24<br>12682..13212 | hypothetical protein (176)             | <a href="#">AKC04854.1</a> hypothetical protein AYO145A_026<br><i>Escherichia</i> phage vB_EcoM_AYO145A (176) | 95/97<br>(176)                                                   | 9e-119  |
| ORF25<br>13281..13529 | hypothetical protein (82)              | <a href="#">gb AGF89487.1 </a> hypothetical protein SP107_00590<br><i>Salmonella</i> phage FSL SP-107 (90)    | 99/100<br>(82)                                                   | 1e-53   |

Table S1. Cont.

| VpaE1 ORF, Position    | Predicted Function (Protein Length aa) | Significant Match (Protein Length aa)                                                                            | Identity aa %/Similarity aa% (Length of the Overlapping Segment) | E value |
|------------------------|----------------------------------------|------------------------------------------------------------------------------------------------------------------|------------------------------------------------------------------|---------|
| ORF26c<br>15903..15280 | hypothetical protein (207)             | <a href="#">gb AFU63601.1 </a> hypothetical protein<br><i>Salmonella</i> phage SPT-1 (201)                       | 91/97<br>(196)                                                   | 2e-130  |
| ORF27c<br>16306..15842 | hypothetical protein (154)             | <a href="#">ref YP_002922810.1 </a> hypothetical protein WV8_gp029<br><i>Escherichia</i> phage wV8 (154)         | 97/99<br>(154)                                                   | 3e-108  |
| ORF28c<br>16724..16269 | hypothetical protein (151)             | <a href="#">gb AGF88759.1 </a> hypothetical protein SP010_00542<br><i>Salmonella</i> phage FSL SP-010 (142)      | 99/100<br>(142)                                                  | 8e-100  |
| ORF29c<br>17003..16779 | hypothetical protein (74)              | <a href="#">gb AFU63458.1 </a> hypothetical protein<br><i>Salmonella</i> phage SBA-1781 (74)                     | 100/100<br>(74)                                                  | 8e-43   |
| ORF30c<br>17583..17080 | hypothetical protein (167)             | <a href="#">AKE44937.1</a> hypothetical protein ECTP1_00057<br><i>Escherichia coli</i> O157 typing phage 1 (167) | 96/97<br>(167)                                                   | 1e-114  |
| ORF31c<br>17798..17580 | hypothetical protein (72)              | <a href="#">AKC04862.1</a> hypothetical protein AYO145A_034<br><i>Escherichia</i> phage vB_EcoM_AYO145A (77)     | 100/100<br>(72)                                                  | 3e-44   |
| ORF32c<br>18340..17795 | hypothetical protein (181)             | <a href="#">ref NP_944833.1 </a> hypothetical protein Felix01p057<br><i>Salmonella</i> phage FelixO1 (181)       | 98/98<br>(181)                                                   | 6e-128  |
| ORF33c<br>18994..18413 | hypothetical protein (193)             | <a href="#">AKC04863.1</a> hypothetical protein AYO145A_035<br><i>Escherichia</i> phage vB_EcoM_AYO145A (193)    | 98/99<br>(193)                                                   | 1e-138  |
| ORF34c<br>19338..18994 | hypothetical protein (114)             | <a href="#">ref YP_002922817.1 </a> hypothetical protein WV8_gp036<br><i>Escherichia</i> phage wV8 (114)         | 100/100<br>(114)                                                 | 3e-76   |
| ORF35c<br>19624..19331 | hypothetical protein (97)              | <a href="#">AKE44932.1</a> hypothetical protein ECTP1_00052<br><i>Escherichia coli</i> O157 typing phage 1 (97)  | 98/100<br>(97)                                                   | 9e-63   |
| ORF36c<br>20031..19624 | hypothetical protein (135)             | <a href="#">ref YP_002922819.1 </a> hypothetical protein WV8_gp038<br><i>Escherichia</i> phage wV8 (129)         | 93/94<br>(135)                                                   | 2e-85   |
| ORF37c<br>20422..20024 | hypothetical protein (132)             | <a href="#">YP_009146287.1</a> hypothetical protein HB2014_42<br><i>Salmonella</i> phage HB-2014 (132)           | 95/98<br>(132)                                                   | 5e-88   |
| ORF38c<br>20938..20474 | lysine (154)                           | <a href="#">gb AGF89474.1 </a> lysine<br><i>Salmonella</i> phage FSL SP-107 (154)                                | 100/100<br>(154)                                                 | 2e-109  |
| ORF39c<br>21822..20938 | putative tail protein (294)            | <a href="#">gb AGF88769.1 </a> hypothetical protein SP010_00592<br><i>Salmonella</i> phage FSL SP-010 (294)      | 96/96<br>(294)                                                   | 0.0     |

Table S1. Cont.

| VpaE1 ORF, Position    | Predicted Function (Protein Length aa) | Significant Match (Protein Length aa)                                                                         | Identity aa %/Similarity aa% (Length of the Overlapping Segment) | E Value |
|------------------------|----------------------------------------|---------------------------------------------------------------------------------------------------------------|------------------------------------------------------------------|---------|
| ORF40c<br>22190..21819 | hypothetical protein (123)             | <a href="#">gb ACZ55588.1 </a> hypothetical protein<br><i>Staphylococcus</i> phage SA1 (123)                  | 99/99<br>(123)                                                   | 3e-85   |
| ORF41c<br>22828..22238 | hypothetical protein (196)             | <a href="#">ref YP_002922824.1 </a> hypothetical protein WV8_gp043<br><i>Escherichia</i> phage wV8 (196)      | 99/100<br>(196)                                                  | 2e-138  |
| ORF42c<br>23055..22822 | hypothetical protein (77)              | <a href="#">ref YP_002922825.1 </a> hypothetical protein WV8_gp044<br><i>Escherichia</i> phage wV8 (77)       | 100/100<br>(77)                                                  | 4e-49   |
| ORF43c<br>23219..23037 | hypothetical protein (60)              | <a href="#">ref YP_001504372.1 </a> hypothetical protein Felix01p077<br><i>Salmonella</i> phage FelixO1 (53)  | 100/100<br>(53)                                                  | 3e-30   |
| ORF44<br>23448..23819  | hypothetical protein (123)             | <a href="#">ref YP_002922827.1 </a> hypothetical protein WV8_gp046<br><i>Escherichia</i> phage wV8 (123)      | 100/100<br>(123)                                                 | 4e-82   |
| ORF45<br>23902..25317  | hypothetical protein (471)             | <a href="#">gb AGR48505.1 </a> hypothetical protein JH2_109<br><i>Escherichia</i> phage JH2 (471)             | 99/99<br>(471)                                                   | 0.0     |
| ORF46<br>28403..28960  | hypothetical protein (185)             | <a href="#">AKC04878.1</a> hypothetical protein AYO145A_050<br><i>Escherichia</i> phage vB_EcoM_AYO145A (185) | 99/99<br>(185)                                                   | 9e-131  |
| ORF47<br>29412..30146  | hypothetical protein (244)             | <a href="#">gb AFQ96189.1 </a> hypothetical protein Phi87_210<br>Enterobacteria phage UAB_Phi87 (244)         | 98/98<br>(244)                                                   | 2e-169  |
| ORF48<br>30209..30436  | hypothetical protein (75)              | <a href="#">ref NP_944880.1 </a> hypothetical protein Felix01p101<br><i>Salmonella</i> phage FelixO1 (75)     | 97/98<br>(75)                                                    | 2e-43   |
| ORF49<br>30543..30743  | hypothetical protein (66)              | <a href="#">ref NP_944882.1 </a> hypothetical protein Felix01p103<br><i>Salmonella</i> phage FelixO1 (66)     | 100/100<br>(66)                                                  | 1e-37   |
| ORF50<br>30765..32366  | terminase, large subunit (533)         | <a href="#">ref NP_944884.1 </a> terminase, large subunit<br><i>Salmonella</i> phage FelixO1 (533)            | 100/100<br>(533)                                                 | 0.0     |
| ORF51<br>32383..33849  | putative structural protein (488)      | <a href="#">ref YP_002922841.1 </a> hypothetical protein WV8_gp059<br><i>Escherichia</i> phage wV8 (488)      | 99/99<br>(488)                                                   | 0.0     |
| ORF52<br>33849..34349  | hypothetical protein (166)             | <a href="#">gb AGR48497.1 </a> hypothetical protein JH2_101<br><i>Escherichia</i> phage JH2 (166)             | 99/99<br>(166)                                                   | 4e-116  |
| ORF53<br>34349..34681  | hypothetical protein (110)             | <a href="#">ref NP_944887.1 </a> hypothetical protein Felix01p108<br><i>Salmonella</i> phage FelixO1 (110)    | 99/100<br>(110)                                                  | 3e-72   |

Table S1. Cont.

| VpaE1 ORF,<br>Position | Predicted Function<br>(Protein Length aa) | Significant Match (Protein Length aa)                                                                         | Identity aa %/Similarity<br>aa% (Length of the<br>Overlapping Segment) | E Value |
|------------------------|-------------------------------------------|---------------------------------------------------------------------------------------------------------------|------------------------------------------------------------------------|---------|
| ORF54<br>34693..36039  | head maturation protease (448)            | <a href="#">ref NP_944888.1 </a> putative head maturation protease<br><i>Salmonella</i> phage FelixO1 (448)   | 99/99<br>(448)                                                         | 0.0     |
| ORF55<br>36051..36428  | structural protein (125)                  | <a href="#">AKC04886.1</a> hypothetical protein AYO145A_058<br><i>Escherichia</i> phage vB_EcoM_AYO145A (125) | 97/97<br>(125)                                                         | 2e-83   |
| ORF56<br>36462..37568  | major capsid protein (368)                | <a href="#">gb ACZ55521.1 </a> major capsid protein<br><i>Staphylococcus</i> phage SA1 (368)                  | 99/100<br>(368)                                                        | 0.0     |
| ORF57<br>37589..38038  | hypothetical protein (149)                | <a href="#">ref NP_944892.1 </a> hypothetical protein Felix01p113<br><i>Salmonella</i> phage FelixO1 (149)    | 100/100<br>(149)                                                       | 1e-104  |
| ORF58<br>38038..38520  | hypothetical protein (160)                | <a href="#">ref NP_944893.1 </a> phage conserved protein<br><i>Salmonella</i> phage FelixO1 (160)             | 100/100<br>(160)                                                       | 3e-112  |
| ORF59<br>38517..38918  | hypothetical protein (133)                | <a href="#">ref YP_002922850.1 </a> hypothetical protein WV8_gp068<br><i>Escherichia</i> phage wV8 (133)      | 99/100<br>(133)                                                        | 8e-93   |
| ORF60<br>38893..39492  | hypothetical protein (199)                | <a href="#">ref NP_944895.1 </a> hypothetical protein Felix01p116<br><i>Salmonella</i> phage FelixO1 (199)    | 99/99<br>(199)                                                         | 6e-142  |
| ORF61<br>39493..40845  | structural protein (450)                  | <a href="#">gb AFQ96174.1 </a> phage conserved structural protein<br>Enterobacteria phage UAB_Phi87 (450)     | 98/99<br>(450)                                                         | 0.0     |
| ORF62<br>40861..41307  | hypothetical protein (148)                | <a href="#">ref YP_002922853.1 </a> hypothetical protein WV8_gp071<br><i>Escherichia</i> phage wV8 (148)      | 100/100<br>(148)                                                       | 3e-104  |
| ORF63<br>41381..41779  | hypothetical protein (132)                | <a href="#">ref NP_944899.1 </a> hypothetical protein Felix01p120<br><i>Salmonella</i> phage FelixO1 (132)    | 100/100<br>(132)                                                       | 5e-90   |
| ORF64<br>41782..42021  | hypothetical protein (79)                 | <a href="#">ref NP_944900.1 </a> hypothetical protein Felix01p121<br><i>Salmonella</i> phage FelixO1 (79)     | 100/100<br>(79)                                                        | 1e-49   |
| ORF65<br>42021..44249  | tail tape-measure protein (742)           | <a href="#">gb AGF89449.1 </a> hypothetical protein SP107_00395<br><i>Salmonella</i> phage FSL SP-107 (742)   | 99/99<br>(742)                                                         | 0.0     |
| ORF66<br>44249..45049  | hypothetical protein (266)                | <a href="#">gb AFQ96169.1 </a> hypothetical protein Phi87_180<br>Enterobacteria phage UAB_Phi87 (266)         | 99/100<br>(266)                                                        | 0.0     |
| ORF67<br>45049..45390  | hypothetical protein (113)                | <a href="#">ref YP_002922858.1 </a> hypothetical protein WV8_gp076<br><i>Escherichia</i> phage wV8 (113)      | 100/100<br>(113)                                                       | 3e-77   |

Table S1. Cont.

| VpaE1 ORF,<br>Position | Predicted Function<br>(Protein Length aa) | Significant Match (Protein Length aa)                                                                         | Identity aa %/Similarity<br>aa% (Length of the<br>Overlapping Segment) | E Value |
|------------------------|-------------------------------------------|---------------------------------------------------------------------------------------------------------------|------------------------------------------------------------------------|---------|
| ORF68<br>45390..46367  | hypothetical protein (325)                | <a href="#">gb AFU62379.1 </a> hypothetical protein<br><i>Escherichia</i> phage EC6 (325)                     | 99/99<br>(325)                                                         | 0.0     |
| ORF69<br>46367..46990  | baseplate assembly protein (207)          | <a href="#">gb AFQ96166.1 </a> hypothetical protein Phi87_175<br>Enterobacteria phage UAB_Phi87 (207)         | 100/100<br>(207)                                                       | 4e-153  |
| ORF70<br>46990..47409  | hypothetical protein (139)                | <a href="#">ref NP_944914.1 </a> phage conserved protein<br><i>Salmonella</i> phage FelixO1 (139)             | 100/100<br>(139)                                                       | 5e-97   |
| ORF71<br>47409..48878  | baseplate component (489)                 | <a href="#">gb AGF89443.1 </a> putative baseplate component<br><i>Salmonella</i> phage FSL SP-107 (489)       | 98/99<br>(489)                                                         | 0.0     |
| ORF72<br>48881..49738  | hypothetical protein (285)                | <a href="#">AKC04903.1</a> hypothetical protein AYO145A_075<br><i>Escherichia</i> phage vB_EcoM_AYO145A (285) | 98/99<br>(285)                                                         | 0.0     |
| ORF73<br>49738..50040  | hypothetical protein (100)                | <a href="#">gb AGF89441.1 </a> hypothetical protein SP107_00355<br><i>Salmonella</i> phage FSL SP-107 (100)   | 100/100<br>(100)                                                       | 3e-66   |
| ORF74<br>50043..51215  | tail fiber protein (390)                  | <a href="#">AKC04905.1</a> tail fiber protein<br><i>Escherichia</i> phage vB_EcoM_AYO145A (390)               | 97/98<br>(390)                                                         | 0.0     |
| ORF75<br>51262..53616  | tail fiber protein (784)                  | <a href="#">gb AGR48474.1 </a> putative tail fiber protein<br><i>Escherichia</i> phage JH2 (781)              | 78/84<br>(788)                                                         | 0.0     |
| ORF76<br>53696..53890  | hypothetical protein (64)                 | <a href="#">ref YP_002922867.1 </a> hypothetical protein WV8_gp085<br><i>Escherichia</i> phage wV8 (64)       | 100/100<br>(64)                                                        | 1e-36   |
| ORF77<br>53891..54262  | hypothetical protein (123)                | <a href="#">gb AGR48472.1 </a> hypothetical protein JH2_076<br><i>Escherichia</i> phage JH2 (123)             | 99/100<br>(123)                                                        | 4e-81   |
| ORF78c<br>55199..54300 | thymidylate synthase (299)                | <a href="#">gb AGF88725.1 </a> thymidylate synthase<br><i>Salmonella</i> phage FSL SP-010 (299)               | 99/99<br>(299)                                                         | 0.0     |
| ORF79c<br>55746..55201 | dihydrofolate reductase (181)             | <a href="#">ref YP_002922870.1 </a> dihydrofolate reductase<br><i>Escherichia</i> phage wV8 (181)             | 98/100<br>(181)                                                        | 4e-127  |
| ORF80c<br>56003..55743 | hypothetical protein (88)                 | <a href="#">ref YP_002922871.1 </a> hypothetical protein WV8_gp089<br><i>Escherichia</i> phage wV8 (86)       | 97/96<br>(86)                                                          | 3e-55   |
| ORF81c<br>56519..56004 | hypothetical protein (171)                | <a href="#">ref YP_002922872.1 </a> hypothetical protein WV8_gp090<br><i>Escherichia</i> phage wV8 (171)      | 99/100<br>(171)                                                        | 6e-119  |

Table S1. Cont.

| VpaE1 ORF,<br>Position | Predicted Function<br>(Protein Length aa)   | Significant Match (Protein Length aa)                                                                                 | Identity aa %/Similarity<br>aa% (Length of the<br>Overlapping Segment) | E Value |
|------------------------|---------------------------------------------|-----------------------------------------------------------------------------------------------------------------------|------------------------------------------------------------------------|---------|
| ORF82c<br>56892..56533 | hypothetical protein (119)                  | <a href="#">gb AGF88721.1 </a> hypothetical protein SP010_00315<br><i>Salmonella</i> phage FSL SP-010 (119)           | 100/100<br>(119)                                                       | 5e-82   |
| ORF83c<br>57223..56894 | transcriptional regulatory<br>protein (109) | <a href="#">ref NP_944934.1 </a> putative transcriptional regulatory protein<br><i>Salmonella</i> phage FelixO1 (109) | 99/100<br>(109)                                                        | 2e-75   |
| ORF84c<br>57398..57186 | hypothetical protein (70)                   | <a href="#">ref YP_002922875.1 </a> hypothetical protein WV8_gp093<br><i>Escherichia</i> phage wV8 (70)               | 100/100<br>(70)                                                        | 4e-42   |
| ORF85c<br>57783..57400 | hypothetical protein (127)                  | <a href="#">ref NP_944938.1 </a> hypothetical protein Felix01p159<br><i>Salmonella</i> phage FelixO1 (127)            | 98/98<br>(127)                                                         | 1e-86   |
| ORF86c<br>58615..58175 | hypothetical protein (146)                  | <a href="#">ref YP_002922877.1 </a> hypothetical protein WV8_gp095<br><i>Escherichia</i> phage wV8 (146)              | 100/100<br>(146)                                                       | 1e-102  |
| ORF87c<br>59205..58618 | hypothetical protein (195)                  | <a href="#">ref YP_002922878.1 </a> hypothetical protein WV8_gp096<br><i>Escherichia</i> phage wV8 (195)              | 99/100<br>(195)                                                        | 6e-142  |
| ORF88c<br>59912..59766 | hypothetical protein (48)                   | <a href="#">gb AFO96148.1 </a> hypothetical protein Phi87_152<br>Enterobacteria phage UAB_Phi87 (48)                  | 85/91<br>(48)                                                          | 2e-18   |
| ORF89c<br>61019..59916 | DNA ligase (367)                            | <a href="#">gb AFU62398.1 </a> ATP dependent DNA ligase<br><i>Escherichia</i> phage EC6 (367)                         | 94/94<br>(367)                                                         | 0.0     |
| ORF90c<br>61222..61016 | hypothetical protein (68)                   | <a href="#">AKC04921.1</a> hypothetical protein AYO145A_093<br><i>Escherichia</i> phage vB_EcoM_AYO145A (87)          | 96/97<br>(68)                                                          | 1e-38   |
| ORF91c<br>61450..61232 | hypothetical protein (72)                   | <a href="#">AKC04924.1</a> hypothetical protein AYO145A_096<br><i>Escherichia</i> phage vB_EcoM_AYO145A (72)          | 97/100<br>(68)                                                         | 6e-41   |
| ORF92c<br>62066..61512 | DNA polymerase (184)                        | <a href="#">gb AGR48455.1 </a> DNA polymerase<br><i>Escherichia</i> phage JH2 (184)                                   | 100/100<br>(184)                                                       | 4e-131  |
| ORF93c<br>62516..62280 | endonuclease VII (78)                       | <a href="#">gb AFU63489.1 </a> hypothetical protein<br><i>Salmonella</i> phage SBA-1781 (160)                         | 97/98<br>(78)                                                          | 9e-48   |
| ORF94c<br>62740..62435 | hypothetical protein (101)                  | <a href="#">gb AGR48454.1 </a> hypothetical protein JH2_058<br><i>Escherichia</i> phage JH2 (160)                     | 99/100<br>(71)                                                         | 4e-44   |
| ORF95c<br>65021..62808 | DNA polymerase (737)                        | <a href="#">gb AFU63490.1 </a> DNA polymerase<br><i>Salmonella</i> phage SBA-1781 (727)                               | 99/99<br>(727)                                                         | 0.0     |

Table S1. Cont.

| VpaE1 ORF,<br>Position | Predicted Function<br>(Protein Length aa) | Significant Match (Protein Length aa)                                                                           | Identity aa %/Similarity<br>aa% (Length of the<br>Overlapping Segment) | E Value |
|------------------------|-------------------------------------------|-----------------------------------------------------------------------------------------------------------------|------------------------------------------------------------------------|---------|
| ORF96<br>65249..65671  | hypothetical protein (140)                | <a href="#">ref NP_944959.1 </a> hypothetical protein Felix01p180<br><i>Salmonella</i> phage FelixO1 (140)      | 99/99<br>(140)                                                         | 1e-96   |
| ORF97<br>65673..66464  | hypothetical protein (263)                | <a href="#">gb AFU63492.1 </a> minor tail protein<br><i>Salmonella</i> phage SBA-1781 (266)                     | 92/96<br>(263)                                                         | 2e-170  |
| ORF98<br>66535..67278  | dNMP kinase (247)                         | <a href="#">AIK67908.1</a> putative deoxynucleotide monophosphate kinase<br><i>Escherichia</i> phage HY02 (247) | 98/98<br>(247)                                                         | 5e-177  |
| ORF99<br>67287..67487  | hypothetical protein (66)                 | <a href="#">ref NP_944966.1 </a> hypothetical protein Felix01p187<br><i>Salmonella</i> phage FelixO1 (66)       | 100/100<br>(66)                                                        | 1e-36   |
| ORF100<br>67480..69465 | DNA primase/helicase (661)                | <a href="#">YP_009146344.1</a> putative phage DNA primase/helicase<br><i>Salmonella</i> phage HB-2014 (661)     | 99/99<br>(661)                                                         | 0.0     |
| ORF101<br>69440..69721 | hypothetical protein (93)                 | <a href="#">ref YP_002922892.1 </a> hypothetical protein WV8_gp110<br><i>Escherichia</i> phage wV8 (93)         | 96/98<br>(93)                                                          | 4e-60   |
| ORF102<br>69718..69867 | hypothetical protein (49)                 | <a href="#">ref YP_001504375.1 </a> hypothetical protein FelixO1p245<br><i>Salmonella</i> phage FelixO1 (49)    | 100/100<br>(49)                                                        | 8e-26   |
| ORF103<br>69940..70797 | hypothetical protein (285)                | <a href="#">gb AGF89398.1 </a> hypothetical protein SP107_00140<br><i>Salmonella</i> phage FSL SP-107 (285)     | 99/99<br>(285)                                                         | 0.0     |
| ORF104<br>70860..71906 | exodeoxyribonuclease (348)                | <a href="#">gb AGF88699.1 </a> putative exodeoxyribonuclease<br><i>Salmonella</i> phage FSL SP-010 (348)        | 99/99<br>(348)                                                         | 0.0     |
| ORF105<br>71860..72375 | HNH endonuclease (171)                    | <a href="#">gb AGF88698.1 </a> putative HNH endonuclease<br><i>Salmonella</i> phage FSL SP-010 (163)            | 99/99<br>(163)                                                         | 1e-116  |
| ORF106<br>72372..72872 | NAD synthetase (166)                      | <a href="#">gb AGF88697.1 </a> NAD synthetase<br><i>Salmonella</i> phage FSL SP-010 (166)                       | 100/100<br>(166)                                                       | 2e-118  |
| ORF107<br>72894..73142 | hypothetical protein (82)                 | <a href="#">ref YP_002922898.1 </a> hypothetical protein WV8_gp116<br><i>Escherichia</i> phage wV8 (82)         | 100/100<br>(82)                                                        | 5e-49   |
| ORF108<br>73118..73873 | hypothetical protein (251)                | <a href="#">gb AGF88695.1 </a> hypothetical protein SP010_00185<br><i>Salmonella</i> phage FSL SP-010 (251)     | 99/100<br>(251)                                                        | 0.0     |



Table S1. Cont.

| VpaE1 ORF, Position    | Predicted Function (Protein Length aa)                     | Significant Match (Protein Length aa)                                                                                         | Identity aa %/Similarity aa% (Length of the Overlapping Segment) | E Value |
|------------------------|------------------------------------------------------------|-------------------------------------------------------------------------------------------------------------------------------|------------------------------------------------------------------|---------|
| ORF109<br>73854..74177 | hypothetical protein (107)                                 | <a href="#">ref NP_944987.2 </a> hypothetical protein Felix01p208<br><i>Salmonella</i> phage FelixO1 (107)                    | 100/100<br>(107)                                                 | 8e-74   |
| ORF110<br>74170..74502 | hypothetical protein (110)                                 | <a href="#">AIK67920.1</a> hypothetical protein HY02_109<br><i>Escherichia</i> phage HY02 (110)                               | 98/100<br>(110)                                                  | 6e-73   |
| ORF111<br>74549..76783 | ribonucleoside triphosphate reductase, alpha subunit (744) | <a href="#">gb AGF89405.1 </a> ribonucleoside triphosphate reductase, alpha chain<br><i>Salmonella</i> phage FSL SP-107 (744) | 99/99<br>(744)                                                   | 0.0     |
| ORF112<br>76755..77096 | hypothetical protein (113)                                 | <a href="#">gb AFQ96123.1 </a> hypothetical protein Phi87_112<br>Enterobacteria phage UAB_Phi87 (113)                         | 99/99<br>(113)                                                   | 2e-76   |
| ORF113<br>77033..78166 | ribonucleoside triphosphate reductase, beta subunit (377)  | <a href="#">ref NP_944994.1 </a> ribonucleoside triphosphate reductase, beta chain<br><i>Salmonella</i> phage FelixO1 (357)   | 100/100<br>(357)                                                 | 0.0     |
| ORF114<br>78166..78408 | glutaredoxin (80)                                          | <a href="#">gb AFU63504.1 </a> hypothetical protein<br><i>Salmonella</i> phage SBA-1781 (80)                                  | 100/100<br>(80)                                                  | 5e-53   |
| ORF115<br>78401..78607 | hypothetical protein (68)                                  | <a href="#">AIK67925.1</a> hypothetical protein HY02_114<br><i>Escherichia</i> phage HY02 (68)                                | 100/100<br>(68)                                                  | 1e-37   |
| ORF116<br>78656..80800 | anaerobic NDP reductase (714)                              | <a href="#">gb ACZ55498.1 </a> anaerobic nucleoside diphosphate reductase<br><i>Staphylococcus</i> phage SA1 (714)            | 98/99<br>(714)                                                   | 0.0     |
| ORF117<br>80830..81366 | MobE-like HNH homing endonuclease (178)                    | <a href="#">gb AFU63639.1 </a> hypothetical protein<br><i>Salmonella</i> phage SPT-1 (185)                                    | 99/99<br>(167)                                                   | 2e-118  |
| ORF118<br>81388..81555 | hypothetical protein (55)                                  | <a href="#">AKC04947.1</a> hypothetical protein AYO145A_119<br><i>Escherichia</i> phage vB_EcoM_AYO145A (54)                  | 94/96<br>(54)                                                    | 6e-27   |
| ORF119<br>81531..81731 | hypothetical protein (66)                                  | <a href="#">gb AGF89411.1 </a> hypothetical protein SP107_00205<br><i>Salmonella</i> phage FSL SP-107 (66)                    | 97/96<br>(66)                                                    | 1e-37   |
| ORF120<br>81728..82123 | hypothetical protein (131)                                 | <a href="#">ref NP_945002.1 </a> hypothetical protein Felix01p222<br><i>Salmonella</i> phage FelixO1 (131)                    | 99/99<br>(131)                                                   | 3e-91   |
| ORF121<br>82120..82419 | hypothetical protein (99)                                  | <a href="#">ref YP_002922911.1 </a> hypothetical protein WV8_gp129<br><i>Escherichia</i> phage wV8 (99)                       | 98/100<br>(99)                                                   | 3e-66   |

Table S1. Cont.

| VpaE1 ORF, Position    | Predicted Function (Protein Length aa)       | Significant Match (Protein Length aa)                                                                                    | Identity aa %/Similarity aa% (Length of the Overlapping Segment) | E Value |
|------------------------|----------------------------------------------|--------------------------------------------------------------------------------------------------------------------------|------------------------------------------------------------------|---------|
| ORF122<br>82429..82914 | anaerobic NTP reductase, small subunit (161) | <a href="#">AJF40541.1</a> anaerobic nucleoside-triphosphate reductase subunit<br><i>Salmonella</i> phage Mushroom (161) | 99/98<br>(161)                                                   | 3e-115  |
| ORF123<br>82877..83254 | hypothetical protein (125)                   | <a href="#">ref NP_945005.1 </a> hypothetical protein Felix01p225<br><i>Salmonella</i> phage FelixO1 (125)               | 98/99<br>(125)                                                   | 3e-82   |
| ORF124<br>83221..83478 | hypothetical protein (85)                    | <a href="#">ref NP_945006.1 </a> hypothetical protein Felix01p226<br><i>Salmonella</i> phage FelixO1 (85)                | 98/98<br>(85)                                                    | 2e-51   |
| ORF125<br>83481..83801 | hypothetical protein (106)                   | <a href="#">gb AFU63635.1 </a> hypothetical protein<br><i>Salmonella</i> phage SPT-1 (106)                               | 100/100<br>(106)                                                 | 8e-69   |
| ORF126<br>83853..84368 | hypothetical protein (171)                   | <a href="#">AJF40538.1 </a> hypothetical protein CPT_Mushroom8<br><i>Salmonella</i> phage Mushroom (171)                 | 99/99<br>(171)                                                   | 2e-123  |
| ORF127<br>84361..84639 | hypothetical protein (92)                    | <a href="#">gb AFQ96109.1 </a> hypothetical protein Phi87_92<br>Enterobacteria phage UAB_Phi87 (92)                      | 98/100<br>(92)                                                   | 4e-61   |
| ORF128<br>84651..85532 | ribose-phosphate pyrophosphokinase (293)     | <a href="#">gb AFU63632.1 </a> hypothetical protein<br><i>Salmonella</i> phage SPT-1 (293)                               | 98/98<br>(293)                                                   | 0.0     |
| ORF129<br>85541..86032 | HNH endonuclease (163)                       | <a href="#">gb AFU63402.1 </a> hypothetical protein<br><i>Salmonella</i> phage SBA-1781 (163)                            | 100/100<br>(163)                                                 | 1e-116  |
| ORF130<br>86047..87828 | nicotinamide phosphoribosyltransferase (593) | <a href="#">ref NP_945019.1 </a> Putative nictotinate phosphoribosyltransferase<br><i>Salmonella</i> phage FelixO1 (593) | 98/99<br>(593)                                                   | 0.0     |
| ORF131<br>87882..88217 | hypothetical protein (111)                   | <a href="#">gb AGF88673.1 </a> hypothetical protein SP010_00075<br><i>Salmonella</i> phage FSL SP-010 (111)              | 98/100<br>(111)                                                  | 2e-74   |
| ORF132<br>88199..88375 | hypothetical protein (58)                    | <a href="#">ref NP_945023.1 </a> hypothetical membrane protein<br><i>Salmonella</i> phage FelixO1 (58)                   | 100/100<br>(58)                                                  | 2e-34   |

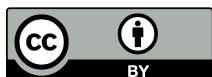

© 2015 by the authors; licensee MDPI, Basel, Switzerland. This article is an open access article distributed under the terms and conditions of the Creative Commons by Attribution (CC-BY) license (<http://creativecommons.org/licenses/by/4.0/>).
